# Supplementary material
Source: PubMed Central journal article supplement (PMC6541661)
Supplement: 13280_2018_1128_MOESM1_ESM.pdf [file 13280_2018_1128_MOESM1_ESM.pdf]

**Ambio**

Electronic Supplementary Material

Title: **The drivers and extent of poison use by Namibia’s communal farmers: Implications for averting the African vulture crisis**

Author: Christie. A. Craig, Robert. L. Thomson, Marco Girardello, Andrea Santangeli

**Supporting Information**

**S1. Survey questions**

*(Questions in italics represent data which has been/will be included in separate publications)*

**Survey number**\_\_\_\_\_ **Interviewer**\_\_\_\_\_

**Date**\_\_\_\_\_ **Time**\_\_\_\_\_ - \_\_\_\_\_ **Consent given** \_\_\_\_\_

1.) Gender: Male\_\_\_Female\_\_\_ **Consent translated**\_\_\_\_\_

2.) Ethnic group

|        |           |         |       |
|--------|-----------|---------|-------|
| Damara | Himba     | Ovambo  | Mixed |
| Nama   | Herero    | Kavango | Other |
| San    | Caprivian | Tswana  |       |

3.) Age\_\_\_\_\_

4.) How long have you farmed in this area?\_\_\_\_\_

5.) How many people are in your household? \_\_\_\_\_

6.) What is your household’s main source of income?\_\_\_\_\_

7.) Do you belong to a conservancy? Yes\_\_\_ No\_\_\_

*If yes:* 8.) Do you and your household benefit from belonging to the conservancy? Yes\_\_\_ No\_\_\_

*,If yes..how do you benefit (a)?*\_\_\_\_\_

**Livestock**

9.) In the last 12 months what is the main cause of livestock loss?

|          |           |                |       |
|----------|-----------|----------------|-------|
| Drought  | Disease   | Injury         | Other |
| Stolen   | Lost      | Unknown        |       |
| Predator | Stillborn | Fell down hole |       |

10.) Livestock numbers and losses to predators (in the last 12 months)?

| Type of Livestock | Number lost | Replacement cost | Predator | Compensation (Yes/No)? |
|-------------------|-------------|------------------|----------|------------------------|
|                   |             |                  |          |                        |
|                   |             |                  |          |                        |
|                   |             |                  |          |                        |

a.) Were you able to vaccinate your animals this year? If not what prevented you from vaccinating?

11.) When last did you lose livestock? \_\_\_\_\_

12.) What is the best way to prevent livestock from being predated? \_\_\_\_\_

13.) I am going to say a statement: Strongly agree, somewhat agree, neutral, somewhat disagree, strongly disagree

- a.) Game animals are a valuable resource to my community \_\_\_\_\_
- b.) Game belong in national parks and not in the farmlands \_\_\_\_\_
- c.) Predators are a valuable resource to my community \_\_\_\_\_
- d.) Predators belong in national parks and not in the farmlands \_\_\_\_\_
- e.) Predators that kill livestock should be killed \_\_\_\_\_

**Crops**

14.) In the last year were any of your household's crops damaged by wildlife? Yes \_\_\_\_\_ No \_\_\_\_\_

15.) Which crops? \_\_\_\_\_

16.) What animal was mainly responsible? \_\_\_\_\_

17.) Did you get compensation for these damages? Yes\_\_\_\_\_ No\_\_\_\_\_ Not Yet\_\_\_\_\_

**Infrastructure**

18.) In the last year were any of your household's infrastructures (water pipes, buildings,fences) damaged by wildlife? Yes\_\_\_\_\_ No\_\_\_\_\_

19.) What infrastructure?\_\_\_\_\_

20.) What animal was mainly responsible?\_\_\_\_\_

**Vultures: beliefs, knowledge and attitudes**

I am going to say a statement: Strongly agree, somewhat agree, neutral, somewhat disagree, strongly disagree

21.) I like to see vultures in this area \_\_\_\_\_

a.) "Can you tell me why you agree/disagree with this?" \_\_\_\_\_

22.) Vultures are useful to have in this area \_\_\_\_\_

a.) "Can you tell me why you agree/disagree with this?" \_\_\_\_\_

23.) Are there any beliefs about vultures in your culture?\_\_\_\_\_

24.) Do vulture body parts have any uses in your culture? \_\_\_\_\_

a.) If yes... What for?\_\_\_\_\_

25.) What is the main thing that you see vultures eating?\_\_\_\_\_

26.) In the last five years have the number of vultures in this area:

Decreased:\_\_\_\_\_ Increased:\_\_\_\_\_ Stayed the same:\_\_\_\_\_

a.)Why do you think this is?\_\_\_\_\_

27.) In the last five years have you seen any dead vultures in this area?

a.) Yes\_\_\_\_\_ No\_\_\_\_\_ b.) How many?\_\_\_\_\_ c.) How did they die?\_\_\_\_\_

**Other farmers in your province**

28.) In your province what do you think is the most popular method used by farmers to control predators?

|        |              |        |
|--------|--------------|--------|
| Trap   | Shoot        | Other: |
| Poison | Snare (wire) |        |

29.) How often do you think farmers in your province over the past year use poison to kill predators?

|       |           |       |            |
|-------|-----------|-------|------------|
| Often | Sometimes | Never | Don't know |
|-------|-----------|-------|------------|

30.) Why do you think farmers in your province use poison rather than other predator control methods?\_\_\_\_\_

31.) What poisons do they use?\_\_\_\_\_

a.)How do they use them?\_\_\_\_\_

b.)Where does the poison come from?\_\_\_\_\_

**Randomised response technique\***

\*We used a technique called the randomised response technique (RRT) to ask farmers direct questions about poison, this technique gave the farmers some protection to answer honestly without us knowing. It works like this:

We will have a bag with 10 balls in it:

**8 are white**

**1 is yellow**

**1 is blue**

The farmer should take a ball out of the bag without showing us what colour they have. We will ask them a question and they should answer according to which ball they get. They should answer as follows

**White: give a TRUE answer**

**Blue: Say NO regardless of what their true answer is**

**Yellow: Say YES regardless of what their true answer is**

This way if a farmer says yes to one of the questions we won't know whether it was because they are telling the truth or because they got a white ball

**RRT questions**

32.) *In the last year did you or someone in your household kill any predator?*\_\_\_\_\_

33.) In the last year did you or someone in your household use poison to kill any predator?\_\_\_\_\_

34.) Would you consider using poison to kill a predator, if your household lost livestock to predators?\_\_\_\_\_

35.) *In the last year did you or anyone in your household kill any vultures by accident?*\_\_\_\_\_

### **Commercial vs. Communal**

36.) We conducted this study in commercial areas and found that many commercial farmers use poison. It appears that communal farmers do not use poison as often, why do you think this is?
